# Supplementary material for: CAR-T cells and TRUCKs that recognize an EBNA-3C-derived epitope presented on HLA-B*35 control Epstein-Barr virus-associated lymphoproliferation
Source: PubMed Central journal article supplement — J Immunother Cancer. 2020 Oct 30;8(2):e000736. doi: 10.1136/jitc-2020-000736 (PMC7604878; doi:10.1136/jitc-2020-000736), 2020-10-30
Supplement: jitc-2020-000736supp001.pdf [file jitc-2020-000736supp001.pdf]

## SUPPLEMENTARY TABLES

**Supplementary Table S1. Utilized cell lines and cultivation.** RPMI 1640 medium (Lonza), Fetal bovine serum (FBS; Sigma-Aldrich), L-glutamine (c.c.pro), IL-2 (Proleukin-S, Novartis), DMEM (Lonza).

| Cell line | Order number | Supplier                                   | Cultivation medium                                  |
|-----------|--------------|--------------------------------------------|-----------------------------------------------------|
| JE6-1 TPR |              | Kindly provided by Prof. Peter Steinberger | RPMI 1640, 10% FBS, 2 mM L-glutamine                |
| Jurkat    | ACC 282      | DSMZ                                       | RPMI 1640, 10% FBS, 2 mM L-glutamine                |
| K562      | ACC 10       | DSMZ                                       | RPMI 1640, 10% FBS, 2 mM L-glutamine                |
| NK-92     | ACC 488      | DSMZ                                       | RPMI 1640, 10% FBS, 2 mM L-glutamine, 200 U/mL IL-2 |
| SPI-801   | ACC 86       | DSMZ                                       | RPMI 1640, 10% FBS, 2 mM L-glutamine                |
| 293T      | ACC 635      | DSMZ                                       | DMEM, 10% FBS, 2 mM L-glutamine                     |

**Supplementary Table S2. Antibodies used for flow cytometry.** Peridinin-chlorophyll-protein (PerCP), Alexa Fluor® (AF), allophycocyanin (APC), Brilliant Violet™ (BV), phycoerythrin (PE), fluorescein isothiocyanate (FITC).

| Antigen             | Antibody clone | Fluorophore | Supplier                 |
|---------------------|----------------|-------------|--------------------------|
| CD3                 | SK7            | PerCP       | BioLegend                |
| CD8                 | SK1            | AF700       | BioLegend                |
| CD8                 | SK1            | APC         | BioLegend                |
| CD25                | BC96           | BV421       | BioLegend                |
| CD25                | BC96           | PE-Cy7      | BioLegend                |
| CD45RA              | HI100          | BV605       | BioLegend                |
| CD62L               | DREG-56        | BV510       | BioLegend                |
| CD69                | FN50           | APC-Cy7     | BioLegend                |
| CD69                | FN50           | BV605       | BioLegend                |
| CD137               | 4B4-1          | APC         | BioLegend                |
| CD137               | 4B4-1          | PE-Cy7      | BioLegend                |
| EGFRt               | -              | biotin      | ImClone Systems          |
| HLA-ABC             | W6/32          | FITC        | Bio-Rad                  |
| IFN- $\gamma$       | 4S.B3          | APC-Cy7     | BioLegend                |
| Human IgG+IgM (H+L) | -              | PE          | Jackson ImmunoResearch   |
| PD-1                | EH12.2H7       | APC         | BioLegend                |
| Streptavidin        | -              | PE          | Thermo Fisher Scientific |
| TNF- $\alpha$       | Mab11          | APC         | BioLegend                |
| TNF- $\alpha$       | Mab11          | PE-Cy7      | BioLegend                |
