# Supplementary figures and images for: CAR-T cells and TRUCKs that recognize an EBNA-3C-derived epitope presented on HLA-B*35 control Epstein-Barr virus-associated lymphoproliferation
Source: PubMed Central journal article supplement — J Immunother Cancer. 2020 Oct 30;8(2):e000736. doi: 10.1136/jitc-2020-000736 (PMC7604878; doi:10.1136/jitc-2020-000736), 2020-10-30

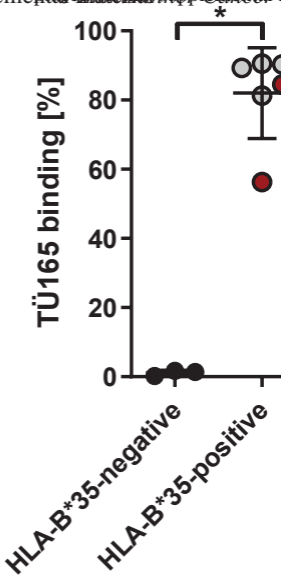

Supplement: jitc-2020-000736supp003.pdf [file jitc-2020-000736supp003.pdf]

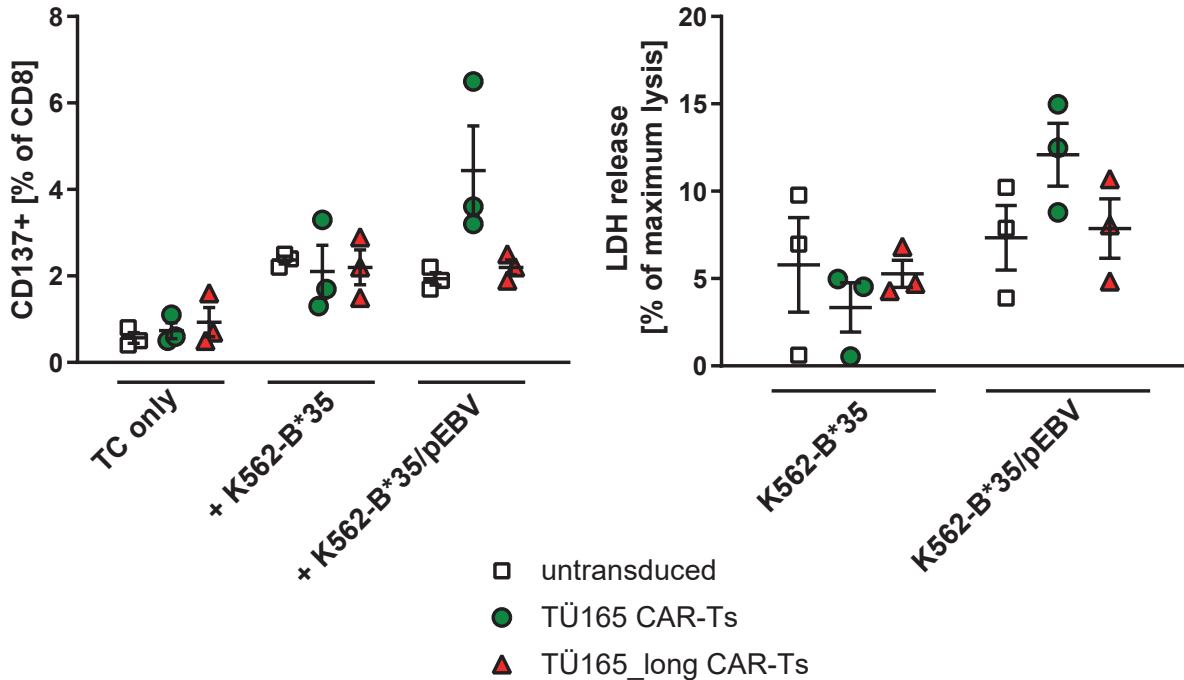

Supplement: jitc-2020-000736supp004.pdf [file jitc-2020-000736supp004.pdf]

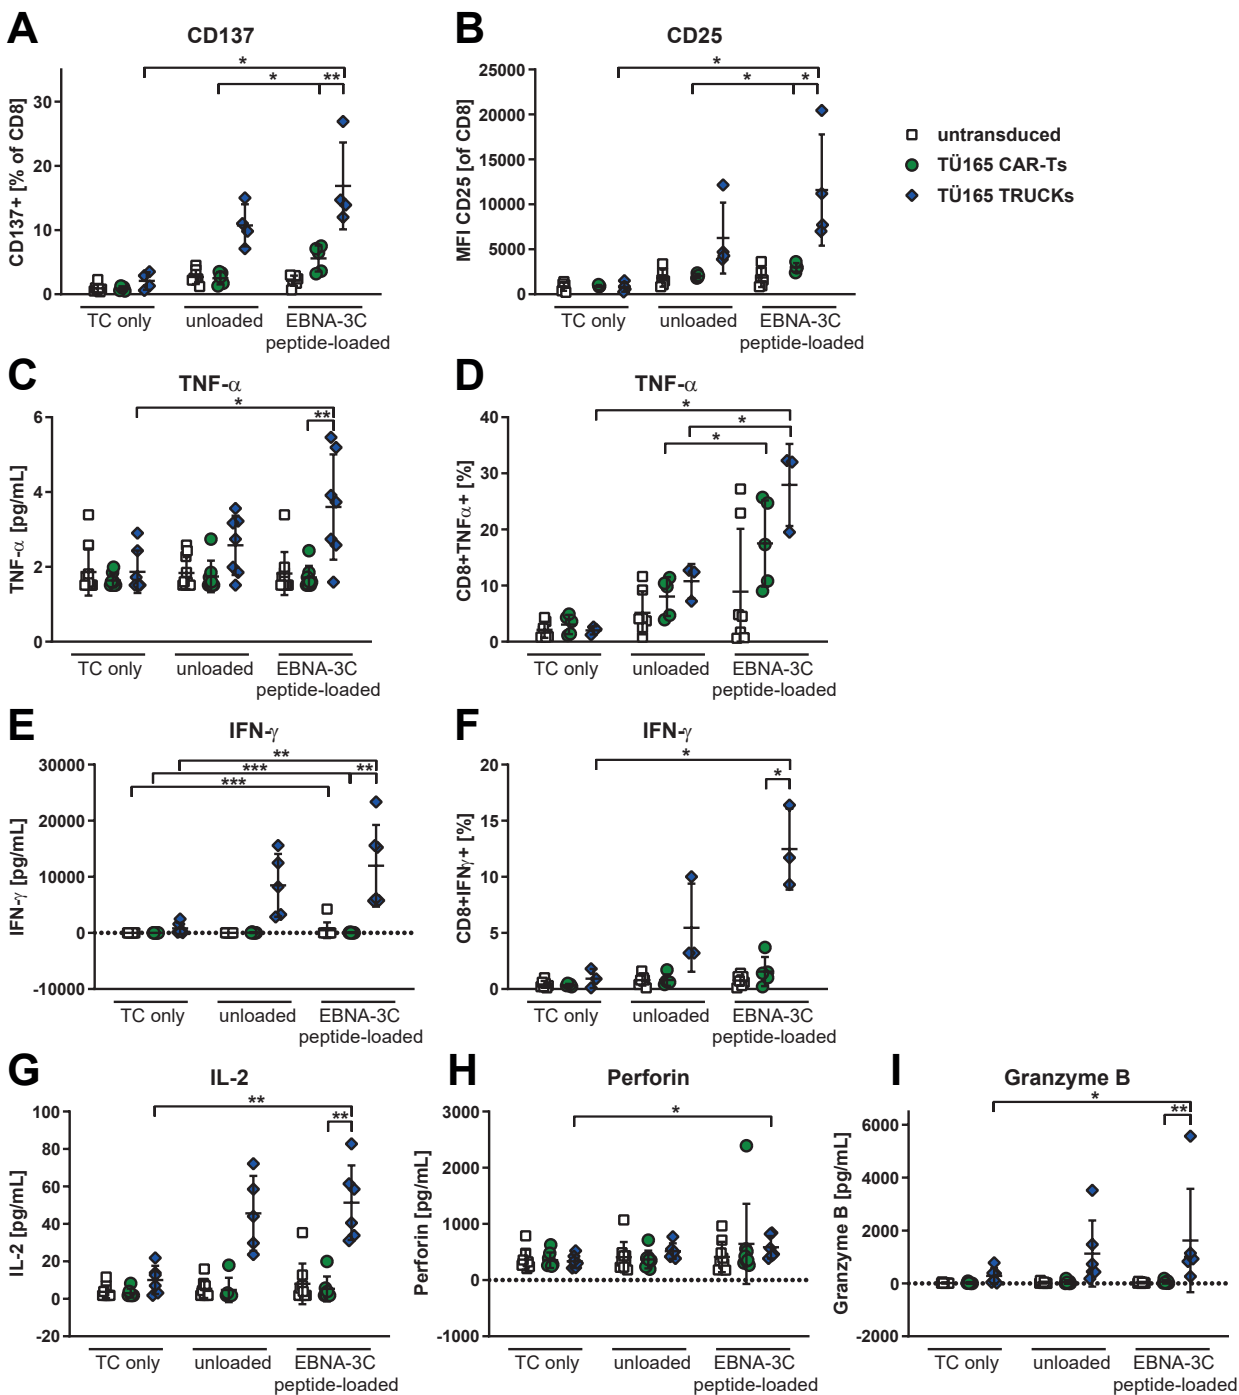

Supplement: jitc-2020-000736supp005.pdf [file jitc-2020-000736supp005.pdf]

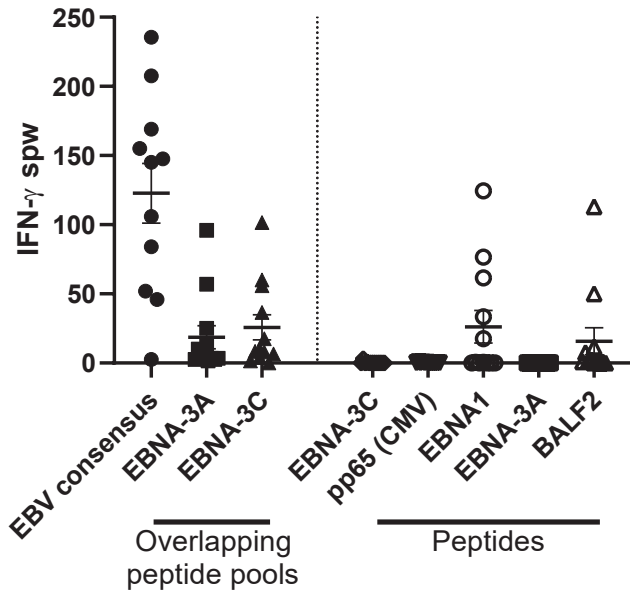

Supplement: jitc-2020-000736supp007.pdf [file jitc-2020-000736supp007.pdf]
